# Supplementary material for: Supramolecular macrocycles reversibly assembled by Te…O chalcogen bonding
Source: PubMed Central journal article supplement (PMC4838886; doi:10.1038/ncomms11299), 2016-04-19
Supplement: ncomms11299-s1.pdf [file ncomms11299-s1.pdf]

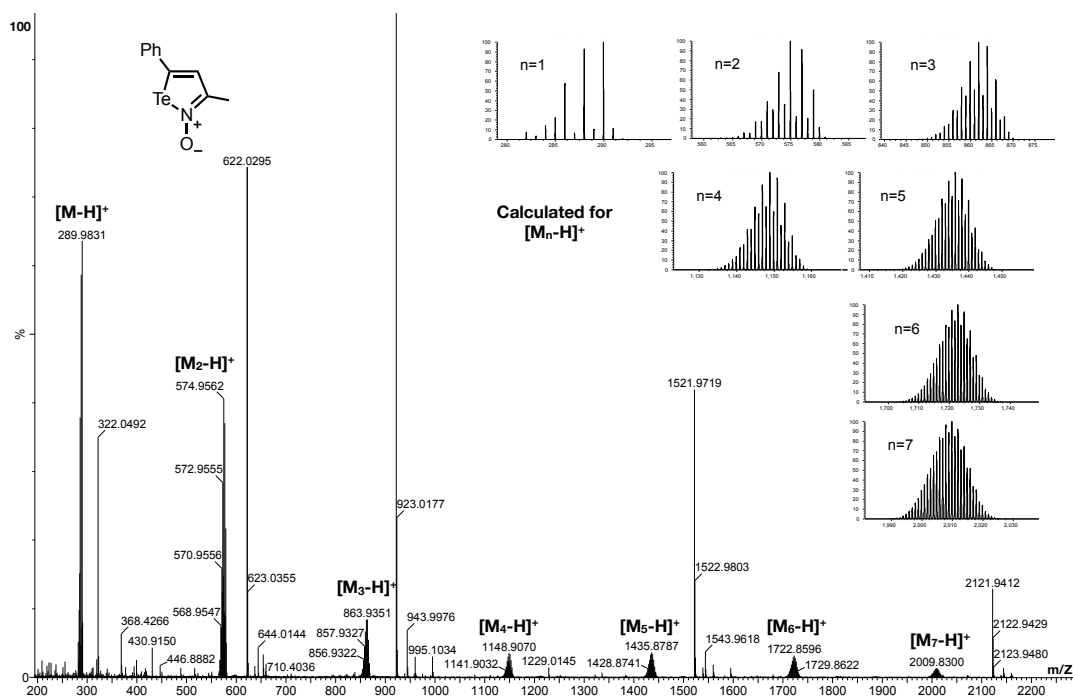

**Supplementary Figure 1.** Electrospray Mass Spectrum of **1b**. Calculated isotopic patterns for  $[M^n-H]^+$  ions are displayed in the insets.

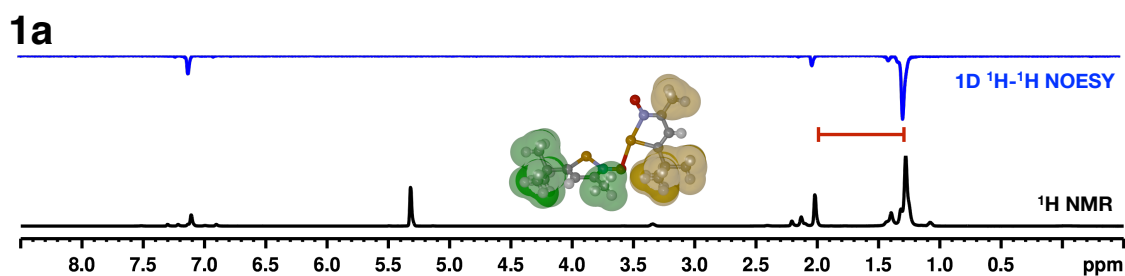

**Supplementary Figure 2.** 1D  $^1\text{H}$ -NMR and 1D-NOESY spectra of **1a** in  $\text{CD}_2\text{Cl}_2$  at 190K. The over-imposed structures portray the van-der-Waals surfaces of the methyl and *tert*-butyl groups of each molecule in a pair modeled with coordinates extracted from the crystal structures of **1a**<sup>1</sup>. The resonance of residual  $\text{CH}_2\text{Cl}_2$  is present at 5.32 ppm.

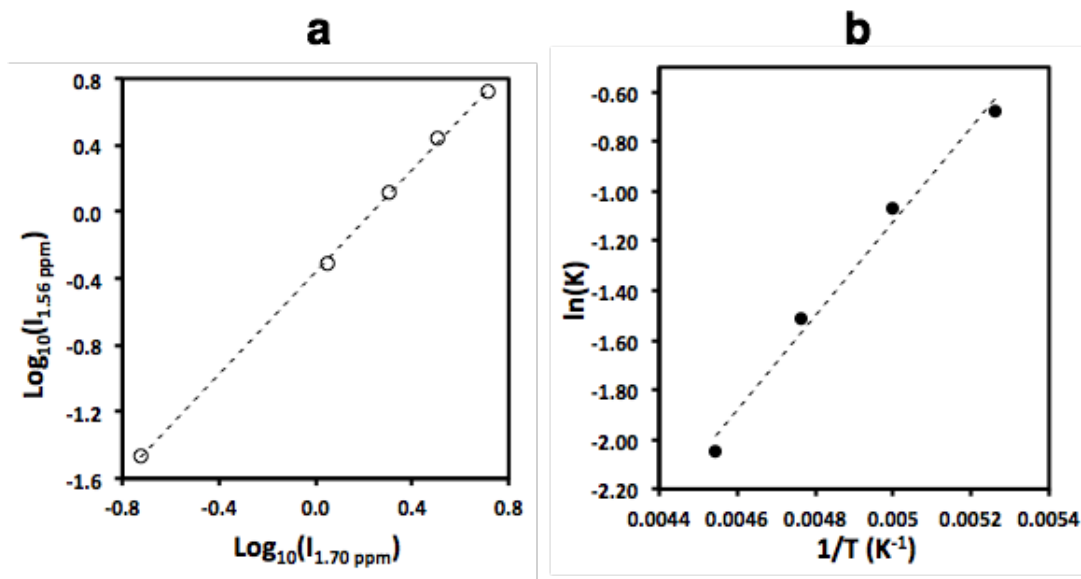

**Supplementary Figure 3.** Thermodynamics of aggregation of **1b<sub>4</sub>**. a) Determination of stoichiometric coefficient ( $n$ ) and equilibrium constant ( $K = |\mathbf{1b}_{4n}|/|\mathbf{1b}_4|^n$ ); b) van't Hoff plot.

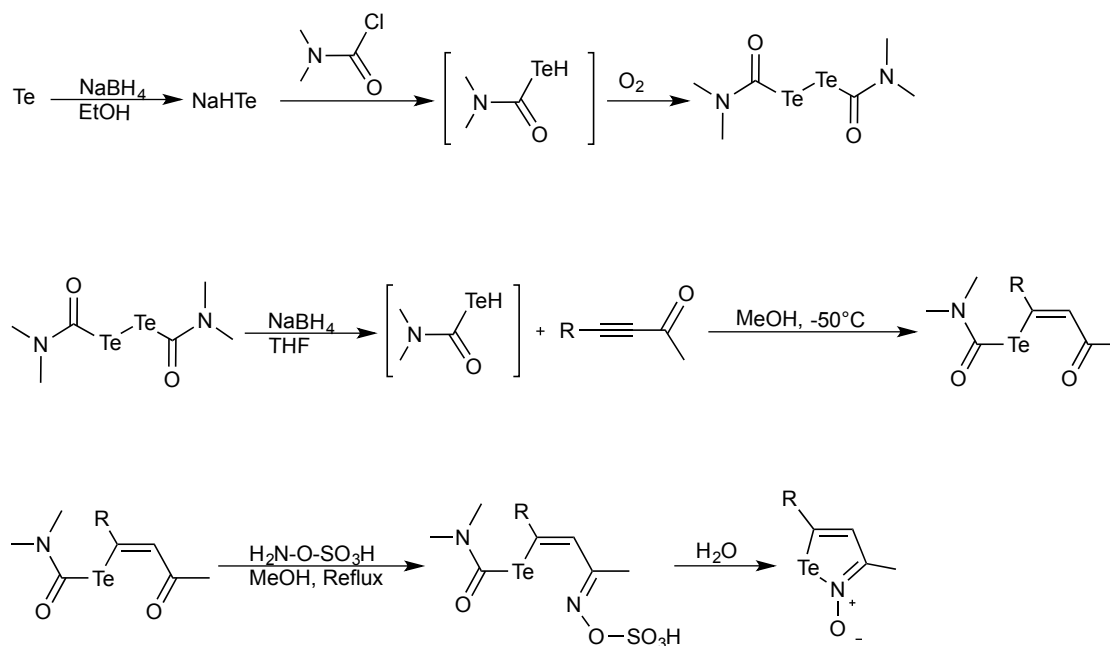

**Supplementary Figure 4.** Sequence of reactions used for the syntheses of **1a** (R=*t*-Bu) and **1b** (R=Ph).

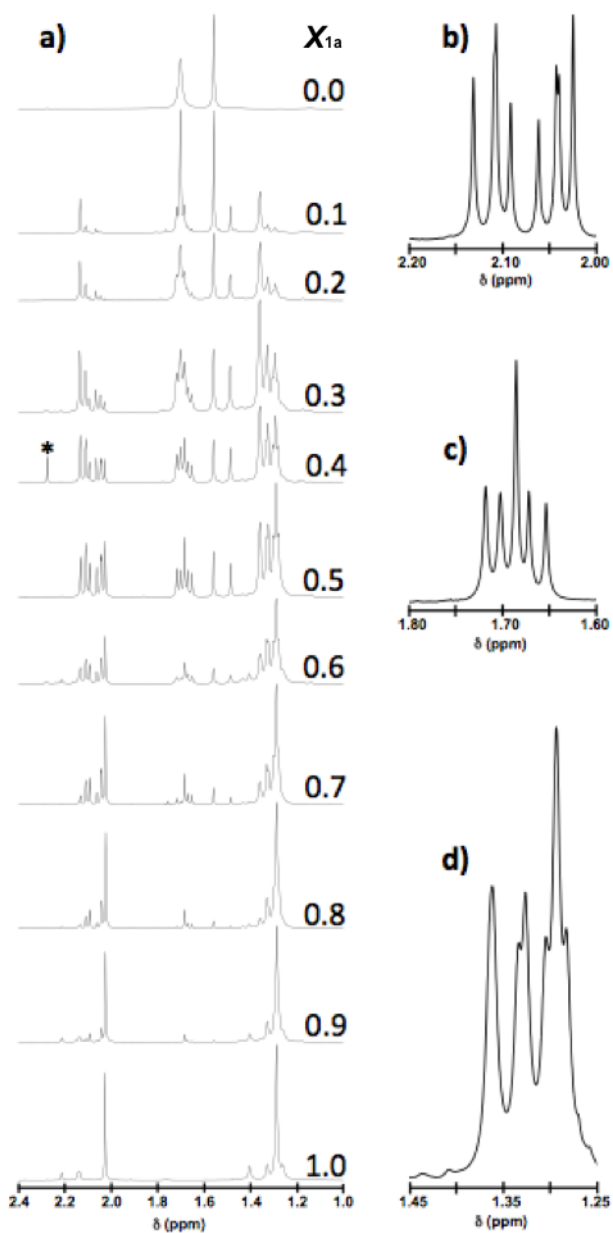

**Supplementary Figure 5.** a)  $^1\text{H}$  NMR spectra of mixtures of **1a** and **1b** at 190 K, \* denotes the resonance of a trace amount of THF. b), c), d) expanded sections of the spectrum of the equimolar mixture (i.e.  $X_{1a} = 0.5$ ).

**Supplementary Table 1.** Crystallographic and refinement parameters for all compounds.

| Crystal Composition                            | 3( <b>1b</b> )•<br>(C <sub>6</sub> H <sub>6</sub> )             | <b>1b</b>                                      | 12( <b>1b</b> )•<br>2(CH <sub>2</sub> Cl <sub>2</sub> )                 | 3( <b>1b</b> )•<br>(C <sub>4</sub> H <sub>8</sub> O)                          | 0.86Pd•1.73BF <sub>4</sub> •<br>4( <b>1b</b> )•<br>1.72(CH <sub>2</sub> Cl <sub>2</sub> )                                                                        | 0.80Pd•1.59(BF <sub>4</sub> )•<br>4( <b>1b</b> )•<br>1.41(CH <sub>2</sub> Cl <sub>2</sub> )                                                                     | 4( <b>1b</b> )•C <sub>60</sub>                 |
|------------------------------------------------|-----------------------------------------------------------------|------------------------------------------------|-------------------------------------------------------------------------|-------------------------------------------------------------------------------|------------------------------------------------------------------------------------------------------------------------------------------------------------------|-----------------------------------------------------------------------------------------------------------------------------------------------------------------|------------------------------------------------|
| CCDC                                           | 1414076                                                         | 1414079                                        | 1414078                                                                 | 1414081                                                                       | 1415229                                                                                                                                                          | 1414080                                                                                                                                                         | 1414077                                        |
| Empirical formula                              | C <sub>12</sub> H <sub>11</sub> NOTe                            | C <sub>10</sub> H <sub>9</sub> NOTe            | C <sub>61</sub> H <sub>55</sub> N <sub>6</sub> O <sub>6</sub> ClTe<br>e | C <sub>68</sub> H <sub>70</sub> N <sub>6</sub> O <sub>7</sub> Te <sub>6</sub> | C <sub>41.72</sub> H <sub>39.44</sub> B <sub>1.73</sub> N <sub>4</sub> O <sub>4</sub><br>F <sub>6.92</sub> Cl <sub>3.44</sub> Pd <sub>0.86</sub> Te <sub>4</sub> | C <sub>41.41</sub> H <sub>38.82</sub> B <sub>1.59</sub> N <sub>4</sub> O <sub>4</sub><br>F <sub>6.36</sub> Cl <sub>2.82</sub> Pd <sub>0.8</sub> Te <sub>4</sub> | C <sub>25</sub> H <sub>9</sub> NOTe            |
| Crystal system,<br>Space group                 | Orthorhombic,<br>P 2 <sub>1</sub> 2 <sub>1</sub> 2 <sub>1</sub> | Triclinic,<br>P -1                             | Triclinic,<br>P -1                                                      | Triclinic,<br>R -3                                                            | Tetragonal,<br>I4(1)/a                                                                                                                                           | Tetragonal,<br>I4(1)/a                                                                                                                                          | monoclinic,<br>C 2/c                           |
| a [Å]                                          | 8.6720(11)                                                      | 8.3469(2)                                      | 14.457(3)                                                               | 21.706(4)                                                                     | 11.2576(14)                                                                                                                                                      | 11.2652(2)                                                                                                                                                      | 23.9972(18)                                    |
| b [Å]                                          | 12.6536(17)                                                     | 9.7654(2)                                      | 15.311(3)                                                               | 21.706(4)                                                                     | 11.2576(14)                                                                                                                                                      | 11.2652(2)                                                                                                                                                      | 13.2242(10)                                    |
| c [Å]                                          | 31.538(4)                                                       | 13.0143(3)                                     | 15.817(3)                                                               | 12.127(2)                                                                     | 40.011(5)                                                                                                                                                        | 40.0616(9)                                                                                                                                                      | 21.0668(16)                                    |
| α [°]                                          | 90                                                              | 71.8880(8)                                     | 105.395(3)                                                              | 90                                                                            | 90                                                                                                                                                               | 90                                                                                                                                                              | 90                                             |
| β [°]                                          | 90                                                              | 85.5200(8)                                     | 102.892(3)                                                              | 90                                                                            | 90                                                                                                                                                               | 90                                                                                                                                                              | 97.8540(10)                                    |
| γ [°]                                          | 90                                                              | 82.0910(8)                                     | 103.246(3)                                                              | 120                                                                           | 90                                                                                                                                                               | 90                                                                                                                                                              | 90                                             |
| V [Å <sup>3</sup> ]                            | 3460.7(8)                                                       | 997.95(4)                                      | 3131.8(10)                                                              | 4930.3(10)                                                                    | 5070.7(14)                                                                                                                                                       | 5084.0(2)                                                                                                                                                       | 6622.7(9)                                      |
| Z, ρ(calc.) [g.<br>cm <sup>-3</sup> ]          | Z: 4                                                            | Z: 1, 1.915                                    | Z: 2, 1.962                                                             | Z: 3, 1.8774                                                                  | Z: 4, 1.966                                                                                                                                                      | Z: 4, 1.952                                                                                                                                                     | Z: 8, 1.934                                    |
| T [K]                                          | 100.15                                                          | 100.15                                         | 100.15                                                                  | 100(2)                                                                        | 100.15                                                                                                                                                           | 100.15                                                                                                                                                          | 296.15                                         |
| μ[mm <sup>-1</sup> ]                           | 2.551                                                           | 2.939                                          | 3.188                                                                   | 2.677                                                                         | 2.777                                                                                                                                                            | 2.760                                                                                                                                                           | 1.815                                          |
| θ range                                        | 2.436- 27.352                                                   | 1.647- 26.371                                  | 2.357- 28.374                                                           | 1.88- 27.46                                                                   | 1.879-25.346                                                                                                                                                     | 1.878-27.499                                                                                                                                                    | 4.781-34.974                                   |
| Limiting indices                               | -11 ≤ h ≤ 9,<br>-16 ≤ k ≤ 16,<br>-37 ≤ l ≤ 40                   | -10 ≤ h ≤ 10,<br>-12 ≤ k ≤ 12,<br>-16 ≤ l ≤ 16 | -18 ≤ h ≤ 18,<br>-19 ≤ k ≤ 19,<br>-19 ≤ l ≤ 19                          | -28 ≤ h ≤ 28,<br>-28 ≤ k ≤ 23,<br>-15 ≤ l ≤ 11                                | -13 ≤ h ≤ 13,<br>-7 ≤ k ≤ 13,<br>-42 ≤ l ≤ 44                                                                                                                    | -14 ≤ h ≤ 14,<br>-14 ≤ k ≤ 14,<br>-52 ≤ l ≤ 52                                                                                                                  | -36 ≤ h ≤ 38,<br>-21 ≤ k ≤ 18,<br>-23 ≤ l ≤ 33 |
| Refl. collec./<br>unique                       | 38614/ 7931                                                     | 27043/ 4082                                    | 53585/ 12799                                                            | 9638/ 2522                                                                    | 9429/ 2277                                                                                                                                                       | 32559/ 2929                                                                                                                                                     | 31330/ 14335                                   |
| R(int.)                                        | 0.0278                                                          | 0.0158                                         | 0.0400                                                                  | 0.0264                                                                        | 0.0731                                                                                                                                                           | 0.0261                                                                                                                                                          | 0.0385                                         |
| No. of parameters                              | 409                                                             | 237                                            | 736                                                                     | 93                                                                            | 189                                                                                                                                                              | 189                                                                                                                                                             | 507                                            |
| R1* / wR2*<br>(I>2σ(I))                        | 0.0266/ 0.0554                                                  | 0.0128/0.0315                                  | 0.0259/ 0.0516                                                          | 0.0413/0.0942                                                                 | 0.0486/ 0.1306                                                                                                                                                   | 0.0390/ 0.1288                                                                                                                                                  | 0.0404/ 0.0793                                 |
| R1* / wR2* for<br>all data                     | 0.0290/ 0.0575                                                  | 0.0135/ 0.0318                                 | 0.0406/ 0.0553                                                          | 0.0543 / 0.0998                                                               | 0.0827/0.1428                                                                                                                                                    | 0.0432/ 0.1309                                                                                                                                                  | 0.0668/ 0.0862                                 |
| Goodness-of-fit<br>on F <sup>2</sup>           | 1.159                                                           | 1.080                                          | 0.995                                                                   | 0.9975                                                                        | 1.129                                                                                                                                                            | 1.212                                                                                                                                                           | 1.045                                          |
| Larg. diff. peak/<br>hole [e.Å <sup>-3</sup> ] | 1.206/<br>-0.702                                                | 0.957/<br>-0.303                               | 0.970/<br>-1.074                                                        | 2.623/<br>-2.091                                                              | 1.465/<br>-0.832                                                                                                                                                 | 2.730/<br>-0.884                                                                                                                                                | 1.363/<br>-0.745                               |

$$* \quad R1 = \frac{\sum ||F_o| - |F_c||}{\sum |F_o|}, \quad wR2 = \left\{ \frac{\sum [w(F_o^2 - F_c^2)^2]}{\sum w(F_o^2)^2} \right\}^{1/2}$$

**Supplementary Table 2.** Selected Structural Data

| Crystal Composition       | 3( <b>1b</b> )•(C <sub>6</sub> H <sub>6</sub> ) | <b>1b</b>                     | 12( <b>1b</b> )•(CH <sub>2</sub> Cl <sub>2</sub> ) | 3( <b>1b</b> )•(C <sub>4</sub> H <sub>8</sub> O) | 0.86Pd•1.73BF <sub>4</sub> •<br>4( <b>1b</b> )•<br>1.72(CH <sub>2</sub> Cl <sub>2</sub> ) | 0.80Pd•1.59(BF <sub>4</sub> )•<br>4( <b>1b</b> )•<br>1.41(CH <sub>2</sub> Cl <sub>2</sub> ) | 4( <b>1b</b> )•C <sub>60</sub>  |
|---------------------------|-------------------------------------------------|-------------------------------|----------------------------------------------------|--------------------------------------------------|-------------------------------------------------------------------------------------------|---------------------------------------------------------------------------------------------|---------------------------------|
| Aggregate                 | <b>1b<sub>s</sub></b>                           | <b>1b<sub>4</sub></b> (chair) | <b>1b<sub>6</sub></b>                              | <b>1b<sub>6</sub></b>                            | <b>1b<sub>4</sub></b><br>(boat)                                                           | <b>1b<sub>4</sub></b><br>(boat)                                                             | <b>1b<sub>4</sub></b><br>(boat) |
| <b>Bond Distances (Å)</b> |                                                 |                               |                                                    |                                                  |                                                                                           |                                                                                             |                                 |
| Te1-C1                    | 2.100(5)<br>2.105(6)<br>2.106(6)                | 2.084(2)<br>2.080(2)          | 2.093(4)<br>2.099(3)<br>2.101(4)                   | 2.096(5)<br>2.096(9)                             | 2.12(1)                                                                                   | 2.118(6)                                                                                    | 2.088(2)<br>2.098(2)            |
| Te1-N1                    | 2.222(5)<br>2.241(5)                            | 2.197(2)<br>2.198(1)          | 2.230(3)<br>2.257(3)<br>2.258(3)                   | 2.246(4)<br>2.246(5)<br>2.246(6)                 | 2.208(8)                                                                                  | 2.207(5)                                                                                    | 2.216(2)<br>2.225(2)            |
| Te1...O1†                 | 2.176(4)<br>2.207(4)<br>2.208(4)                | 2.203(1)<br>2.242(1)          | 2.171(3)<br>2.176(3)<br>2.178(2)                   | 2.197(4)<br>2.197(6)                             | 2.168(7)                                                                                  | 2.174(5)                                                                                    | 2.195(2)<br>2.221(2)            |
| N1-O1                     | 1.356(6)<br>1.357(6)<br>1.365(6)                | 1.360(2)<br>1.363(2)          | 1.359(4)<br>1.364(4)<br>1.366(3)                   | 1.371(6)<br>1.371(7)<br>1.371(9)                 | 1.37(1)                                                                                   | 1.356(7)                                                                                    | 1.356(3)<br>1.363(2)            |
| N1-O1†                    | 4.369(6)<br>4.399(6)<br>4.414(6)                | 4.355(2)<br>4.394(2)          | 4.370(4)<br>4.377(4)<br>4.407(4)                   | 4.406(6)<br>4.406(7)<br>4.406(8)                 | 4.33(1)                                                                                   | 4.340(6)                                                                                    | 4.372(3)<br>4.381(3)            |
| C1-C2                     | 1.345(8)<br>1.346(8)<br>1.352(9)                | 1.350(3)<br>1.357(2)          | 1.342(6)<br>1.343(6)<br>1.353(5)                   | 1.34(1)<br>1.342(8)<br>1.342(9)                  | 1.34(2)                                                                                   | 1.343(9)                                                                                    | 1.350(3)<br>1.351(4)            |
| C2-C3                     | 1.430(8)<br>1.434(8)<br>1.440(8)                | 1.433(3)<br>1.437(3)          | 1.435(5)<br>1.437(4)<br>1.445(6)                   | 1.431(1)<br>1.431(8)                             | 1.44(1)                                                                                   | 1.45(1)                                                                                     | 1.432(4)<br>1.434(4)            |
| C3-N1                     | 1.288(8)<br>1.298(7)<br>1.302(7)                | 1.303(2)                      | 1.294(5)<br>1.298(4)<br>1.298(5)                   | 1.312(7)                                         | 1.29(1)                                                                                   | 1.295(8)                                                                                    | 1.294(3)<br>1.308(3)            |
| Te1...Te1†                | 3.7403(6)<br>3.7605(7)<br>3.7887(8)             | 3.8426(4)<br>3.8633(2)        | 3.6856(7)<br>3.7166(8)<br>3.7229(7)                | 3.8912(7)<br>3.8912(9)                           | 3.6569(9)                                                                                 | 3.6573(5)                                                                                   | 3.6768(7)<br>3.7448(6)          |
| <b>Bond Angles (°)</b>    |                                                 |                               |                                                    |                                                  |                                                                                           |                                                                                             |                                 |
| N1-Te1-O1†                | 165.9(2)<br>166.4(2)<br>166.6(2)                | 163.44(5)<br>163.52(5)        | 161.9(1)<br>166.2(1)<br>166.8(1)                   | 165.2(2)                                         | 163.8(3)                                                                                  | 163.8(3)                                                                                    | 161.79(7)<br>163.22(7)          |
| N1-Te1-C1                 | 75.8(2)<br>76.0(2)<br>76.4(2)                   | 76.36(6)<br>76.78(6)          | 75.2(1)<br>75.8(1)<br>75.9(1)                      | 75.6(2)                                          | 75.6(3)                                                                                   | 75.6(3)                                                                                     | 76.40(8)<br>76.41(8)            |
| O1-N1-Te1                 | 125.8(3)<br>127.4(3)<br>127.8(3)                | 123.7(1)<br>126.2(1)          | 126.8(2)<br>127.6(2)<br>127.8(2)                   | 126.5(3)<br>126.5(4)                             | 123.6(6)                                                                                  | 123.6(6)                                                                                    | 127.2(1)<br>127.6(1)            |
| <b>Torsion Angles (°)</b> |                                                 |                               |                                                    |                                                  |                                                                                           |                                                                                             |                                 |
| Te1-N1-O1-Te1*            | 6.1(5)<br>14.5(5)<br>21.1(5)                    | 63.1(1)<br>26.1(2)            | 4.9(3)<br>6.1(3)<br>20.7(3)                        | 42.2(5)                                          | 41.5(7)                                                                                   | 41.5(7)                                                                                     | 10.2(2)<br>33.8(2)              |
| N1-O1-Te1*-C1*            | 70.0(4)<br>86.4(4)<br>95.3(4)                   | 101.5(1)<br>156.3(1)          | 64.7(2)<br>79.0(2)<br>95.4(2)                      | 88.4(4)                                          | 107.8(6)                                                                                  | 107.8(6)                                                                                    | 108.4(2)<br>169.5(2)            |
| C1-Te1-N1-O1              | 175.2(4)<br>177.6(5)<br>179.0(5)                | 174.0(1)<br>175.9(1)          | 175.7(3)<br>177.9(3)<br>178.3(3)                   | 173.4(4)<br>173.4(5)                             | 178.6(7)                                                                                  | 178.6(7)                                                                                    | 177.7(2)<br>178.9(2)            |

\* and † denote chemically equivalent atoms in a neighboring **1b** molecule as defined in Fig. 2.

**Supplementary Table 3.** Optimized Cartesian coordinates of **1c**.

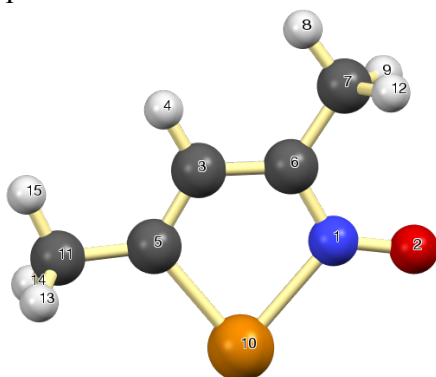

| <b>Atom</b> | <b>X</b> | <b>Y</b>  | <b>Z</b>  |
|-------------|----------|-----------|-----------|
| 1.N         | 1.298052 | 0.016770  | -0.747726 |
| 2.O         | 1.130421 | -1.129482 | -1.230082 |
| 3.C         | 2.155293 | 1.698897  | 0.681357  |
| 4.H         | 2.811007 | 1.961847  | 1.514882  |
| 5.C         | 1.418646 | 2.667344  | 0.064978  |
| 6.C         | 2.102797 | 0.333091  | 0.274293  |
| 7.C         | 2.876495 | -0.784899 | 0.898356  |
| 8.H         | 3.504666 | -0.408999 | 1.713509  |
| 9.H         | 3.510779 | -1.280466 | 0.148673  |
| 10.Te       | 0.290296 | 1.813309  | -1.466682 |
| 11.C        | 1.396598 | 4.123490  | 0.403455  |
| 12.H        | 2.195300 | -1.554836 | 1.289918  |
| 13.H        | 0.391993 | 4.462391  | 0.697127  |
| 14.H        | 1.715624 | 4.747755  | -0.444464 |
| 15.H        | 2.077789 | 4.322975  | 1.243116  |

Supplementary Table 4. Optimized Cartesian coordinates of **1c<sub>2</sub>**.

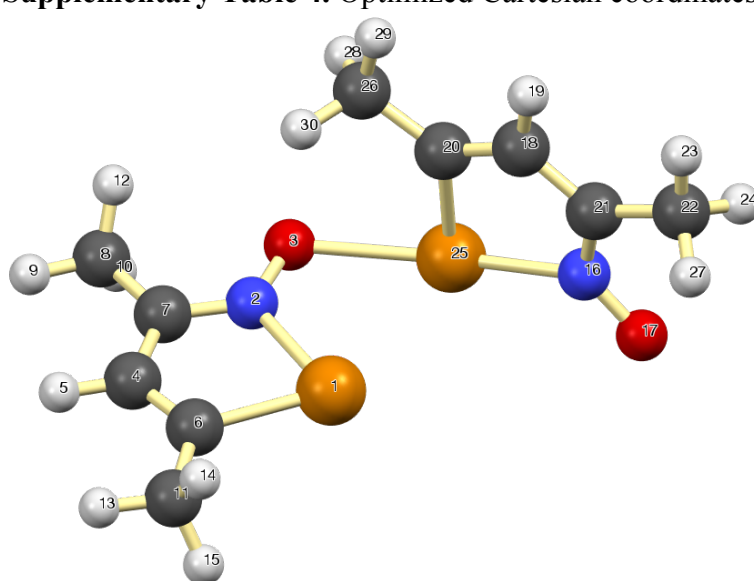

| Atom  | X         | Y         | Z         |
|-------|-----------|-----------|-----------|
| 1.Te  | 1.388045  | -0.908747 | 0.046879  |
| 2.N   | 1.527964  | 1.271069  | -0.059200 |
| 3.O   | 0.518264  | 2.057759  | 0.206957  |
| 4.C   | 3.710639  | 0.722783  | -0.674905 |
| 5.H   | 4.710455  | 1.049367  | -0.971862 |
| 6.C   | 3.394953  | -0.594037 | -0.554500 |
| 7.C   | 2.717054  | 1.720912  | -0.414174 |
| 8.C   | 2.936562  | 3.195878  | -0.515233 |
| 9.H   | 3.962468  | 3.411895  | -0.833396 |
| 10.H  | 2.747581  | 3.678749  | 0.454616  |
| 11.C  | 4.325533  | -1.741025 | -0.796374 |
| 12.H  | 2.230775  | 3.642992  | -1.230138 |
| 13.H  | 5.316890  | -1.376959 | -1.101234 |
| 14.H  | 3.951810  | -2.407328 | -1.588009 |
| 15.H  | 4.454709  | -2.356619 | 0.106128  |
| 16.N  | -2.721950 | -1.069376 | 0.751913  |
| 17.O  | -2.972682 | -1.800713 | 1.754372  |
| 18.C  | -2.828179 | -0.279893 | -1.465233 |
| 19.H  | -3.246384 | -0.388174 | -2.469673 |
| 20.C  | -1.931303 | 0.712100  | -1.218718 |
| 21.C  | -3.250674 | -1.214746 | -0.461884 |
| 22.C  | -4.225519 | -2.327627 | -0.679022 |
| 23.H  | -4.590298 | -2.331685 | -1.712498 |
| 24.H  | -5.079370 | -2.230089 | 0.008154  |
| 25.Te | -1.329654 | 0.654500  | 0.799510  |
| 26.C  | -1.398383 | 1.704097  | -2.197741 |
| 27.H  | -3.759250 | -3.298690 | -0.454107 |
| 28.H  | -1.556216 | 2.739901  | -1.865538 |
| 29.H  | -1.897821 | 1.570364  | -3.168295 |
| 30.H  | -0.315442 | 1.581760  | -2.347753 |

Supplementary Table 5. Optimized Cartesian coordinates of the chair conformer of **1c<sub>4</sub>**.

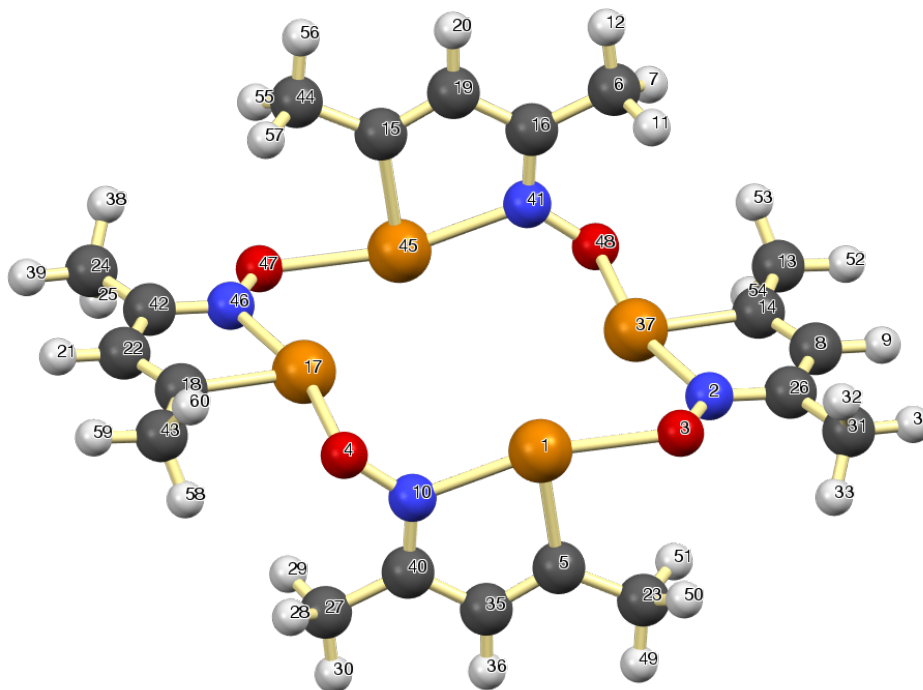

| Atom  | X         | Y         | Z         |
|-------|-----------|-----------|-----------|
| 1.Te  | 1.110175  | -2.622719 | 0.824099  |
| 2.N   | 2.197640  | -1.038849 | 3.249799  |
| 3.O   | 2.059175  | -2.319686 | 2.868617  |
| 4.O   | -0.482847 | -2.911626 | -1.891843 |
| 5.C   | 3.045876  | -2.597021 | 0.017269  |
| 6.C   | -1.744977 | 2.964305  | 3.563379  |
| 7.H   | -1.204316 | 3.880488  | 3.840639  |
| 8.C   | 2.928623  | 0.615493  | 4.708386  |
| 9.H   | 3.504731  | 0.905243  | 5.590270  |
| 10.N  | 0.733614  | -2.838106 | -1.337961 |
| 11.H  | -1.178038 | 2.120305  | 3.984178  |
| 12.H  | -2.744836 | 2.983654  | 4.010553  |
| 13.C  | 2.267256  | 3.022757  | 4.253081  |
| 14.C  | 2.270606  | 1.555420  | 3.969647  |
| 15.C  | -3.045876 | 2.597021  | -0.017269 |
| 16.C  | -1.829826 | 2.846204  | 2.075382  |
| 17.Te | -1.269979 | -0.746671 | -2.313021 |
| 18.C  | -2.270606 | -1.555420 | -3.969647 |
| 19.C  | -3.053562 | 2.735279  | 1.340807  |
| 20.H  | -3.997863 | 2.753747  | 1.889186  |
| 21.H  | -3.504731 | -0.905243 | -5.590270 |
| 22.C  | -2.928623 | -0.615493 | -4.708386 |
| 23.C  | 4.263504  | -2.449510 | 0.868986  |
| 24.C  | -3.521949 | 1.871761  | -5.126283 |
| 25.H  | -2.759242 | 2.576444  | -5.489159 |



|       |           |           |           |
|-------|-----------|-----------|-----------|
| 26.C  | 2.881668  | -0.767945 | 4.345954  |
| 27.C  | 1.744977  | -2.964305 | -3.563379 |
| 28.H  | 1.204316  | -3.880488 | -3.840639 |
| 29.H  | 1.178038  | -2.120305 | -3.984178 |
| 30.H  | 2.744836  | -2.983654 | -4.010553 |
| 31.C  | 3.521949  | -1.871761 | 5.126283  |
| 32.H  | 2.759242  | -2.576444 | 5.489159  |
| 33.H  | 4.200831  | -2.453718 | 4.486552  |
| 34.H  | 4.079502  | -1.471626 | 5.980549  |
| 35.C  | 3.053562  | -2.735279 | -1.340807 |
| 36.H  | 3.997863  | -2.753747 | -1.889186 |
| 37.Te | 1.269979  | 0.746671  | 2.313021  |
| 38.H  | -4.200831 | 2.453718  | -4.486552 |
| 39.H  | -4.079502 | 1.471626  | -5.980549 |
| 40.C  | 1.829826  | -2.846204 | -2.075382 |
| 41.N  | -0.733614 | 2.838106  | 1.337961  |
| 42.C  | -2.881668 | 0.767945  | -4.345954 |
| 43.C  | -2.267256 | -3.022757 | -4.253081 |
| 44.C  | -4.263504 | 2.449510  | -0.868986 |
| 45.Te | -1.110175 | 2.622719  | -0.824099 |
| 46.N  | -2.197640 | 1.038849  | -3.249799 |
| 47.O  | -2.059175 | 2.319686  | -2.868617 |
| 48.O  | 0.482847  | 2.911626  | 1.891843  |
| 49.H  | 5.167714  | -2.537982 | 0.250431  |
| 50.H  | 4.297191  | -3.209262 | 1.660915  |
| 51.H  | 4.279712  | -1.471757 | 1.372286  |
| 52.H  | 2.849845  | 3.232736  | 5.161362  |
| 53.H  | 1.245557  | 3.402359  | 4.388460  |
| 54.H  | 2.695013  | 3.597323  | 3.419824  |
| 55.H  | -4.297191 | 3.209262  | -1.660915 |
| 56.H  | -5.167714 | 2.537982  | -0.250431 |
| 57.H  | -4.279712 | 1.471757  | -1.372286 |
| 58.H  | -1.245557 | -3.402359 | -4.388460 |
| 59.H  | -2.849845 | -3.232736 | -5.161362 |
| 60.H  | -2.695013 | -3.597323 | -3.419824 |

Supplementary Table 6. Optimized Cartesian coordinates of the boat conformer of **1c<sub>4</sub>**.

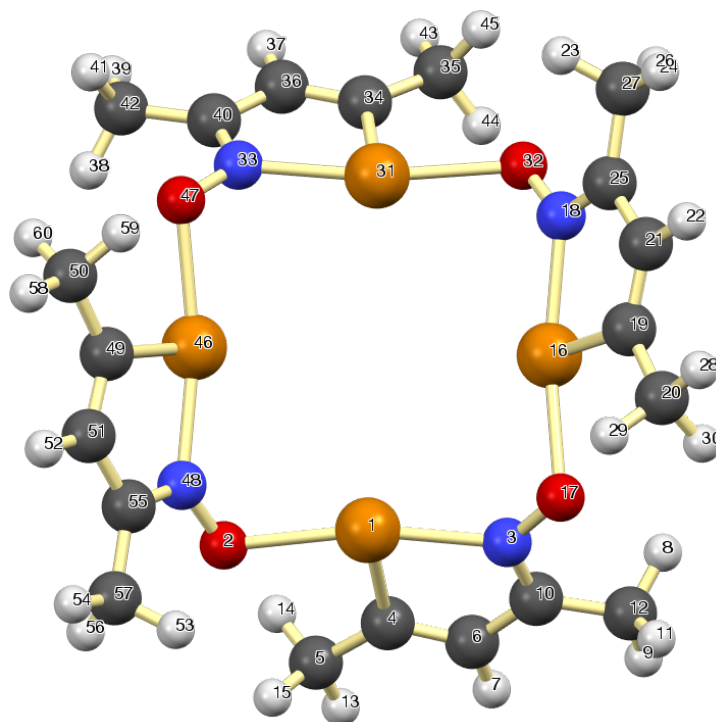

| Atom  | X         | Y         | Z         |
|-------|-----------|-----------|-----------|
| 1.Te  | 1.420574  | 2.402288  | 0.139644  |
| 2.O   | -0.410135 | 3.774302  | 0.546044  |
| 3.N   | 3.369054  | 1.403399  | 0.255944  |
| 4.C   | 2.330556  | 3.380150  | 1.744493  |
| 5.C   | 1.637628  | 4.455847  | 2.516269  |
| 6.C   | 3.591119  | 2.914259  | 2.001998  |
| 7.H   | 4.180673  | 3.334565  | 2.819420  |
| 8.H   | 5.426999  | 0.169038  | 1.550119  |
| 9.H   | 5.986083  | 1.689133  | 2.318897  |
| 10.C  | 4.150625  | 1.856301  | 1.222201  |
| 11.H  | 6.143550  | 1.433468  | 0.555011  |
| 12.C  | 5.505059  | 1.259331  | 1.433405  |
| 13.H  | 2.270873  | 4.791153  | 3.349823  |
| 14.H  | 0.677000  | 4.104250  | 2.916663  |
| 15.H  | 1.403531  | 5.320951  | 1.880036  |
| 16.Te | 2.402288  | -1.420574 | -0.139644 |
| 17.O  | 3.774302  | 0.410135  | -0.546044 |
| 18.N  | 1.403399  | -3.369054 | -0.255944 |
| 19.C  | 3.380150  | -2.330556 | -1.744493 |
| 20.C  | 4.455847  | -1.637628 | -2.516269 |
| 21.C  | 2.914259  | -3.591119 | -2.001998 |
| 22.H  | 3.334565  | -4.180673 | -2.819420 |
| 23.H  | 0.169038  | -5.426999 | -1.550119 |
| 24.H  | 1.689133  | -5.986083 | -2.318897 |
| 25.C  | 1.856301  | -4.150625 | -1.222201 |

|       |           |           |           |
|-------|-----------|-----------|-----------|
| 26.H  | 1.433468  | -6.143550 | -0.555011 |
| 27.C  | 1.259331  | -5.505059 | -1.433405 |
| 28.H  | 4.791153  | -2.270873 | -3.349823 |
| 29.H  | 4.104250  | -0.677000 | -2.916663 |
| 30.H  | 5.320951  | -1.403531 | -1.880036 |
| 31.Te | -1.420574 | -2.402288 | 0.139644  |
| 32.O  | 0.410135  | -3.774302 | 0.546044  |
| 33.N  | -3.369054 | -1.403399 | 0.255944  |
| 34.C  | -2.330556 | -3.380150 | 1.744493  |
| 35.C  | -1.637628 | -4.455847 | 2.516269  |
| 36.C  | -3.591119 | -2.914259 | 2.001998  |
| 37.H  | -4.180673 | -3.334565 | 2.819420  |
| 38.H  | -5.426999 | -0.169038 | 1.550119  |
| 39.H  | -5.986083 | -1.689133 | 2.318897  |
| 40.C  | -4.150625 | -1.856301 | 1.222201  |
| 41.H  | -6.143550 | -1.433468 | 0.555011  |
| 42.C  | -5.505059 | -1.259331 | 1.433405  |
| 43.H  | -2.270873 | -4.791153 | 3.349823  |
| 44.H  | -0.677000 | -4.104250 | 2.916663  |
| 45.H  | -1.403531 | -5.320951 | 1.880036  |
| 46.Te | -2.402288 | 1.420574  | -0.139644 |
| 47.O  | -3.774302 | -0.410135 | -0.546044 |
| 48.N  | -1.403399 | 3.369054  | -0.255944 |
| 49.C  | -3.380150 | 2.330556  | -1.744493 |
| 50.C  | -4.455847 | 1.637628  | -2.516269 |
| 51.C  | -2.914259 | 3.591119  | -2.001998 |
| 52.H  | -3.334565 | 4.180673  | -2.819420 |
| 53.H  | -0.169038 | 5.426999  | -1.550119 |
| 54.H  | -1.689133 | 5.986083  | -2.318897 |
| 55.C  | -1.856301 | 4.150625  | -1.222201 |
| 56.H  | -1.433468 | 6.143550  | -0.555011 |
| 57.C  | -1.259331 | 5.505059  | -1.433405 |
| 58.H  | -4.791153 | 2.270873  | -3.349823 |
| 59.H  | -4.104250 | 0.677000  | -2.916663 |
| 60.H  | -5.320951 | 1.403531  | -1.880036 |

Supplementary Table 7. Optimized Cartesian coordinates of **1c<sub>6</sub>**.

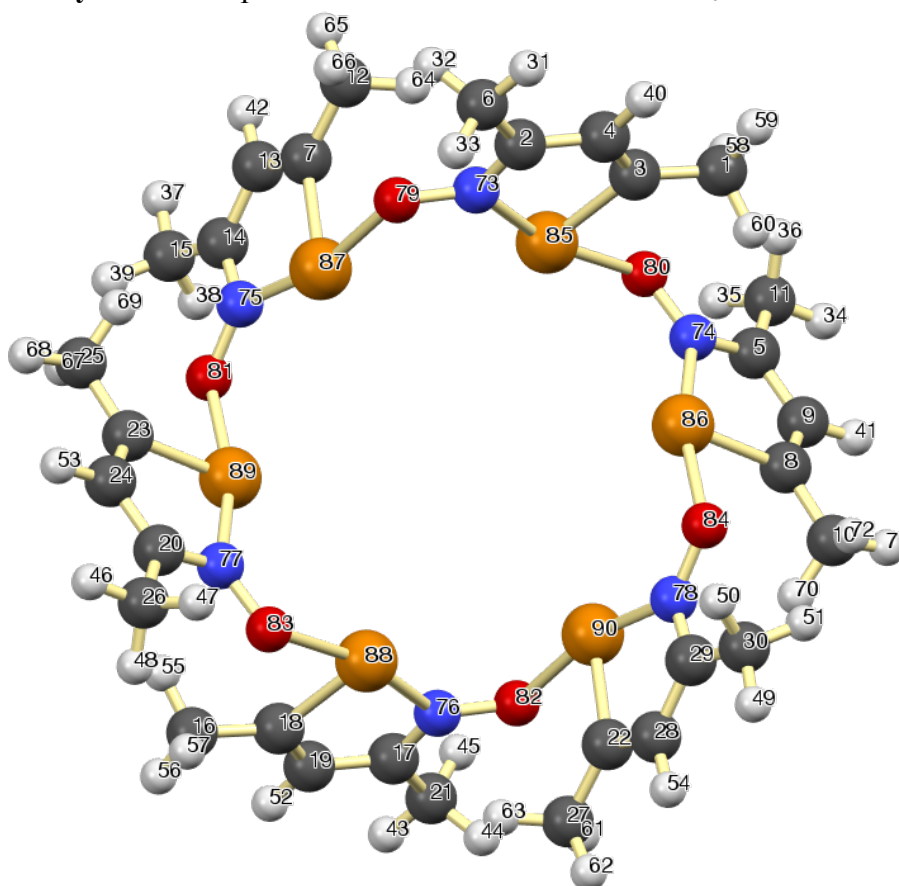

| Atom | X         | Y         | Z         |
|------|-----------|-----------|-----------|
| 1.C  | -4.620340 | -4.351411 | -0.373932 |
| 2.C  | -5.046965 | -1.043253 | -2.278970 |
| 3.C  | -4.551449 | -2.926340 | -0.816165 |
| 4.C  | -5.172348 | -2.425058 | -1.919610 |
| 5.C  | -1.619502 | -4.892990 | 2.279167  |
| 6.C  | -5.699896 | -0.420626 | -3.472040 |
| 7.C  | -4.810546 | 2.479460  | 0.815986  |
| 8.C  | 0.258912  | -5.405699 | 0.816284  |
| 9.C  | -0.485567 | -5.692562 | 1.919846  |
| 10.C | 1.458661  | -6.177904 | 0.374190  |
| 11.C | -2.484973 | -5.146802 | 3.472459  |
| 12.C | -6.079018 | 1.826486  | 0.373538  |
| 13.C | -4.687171 | 3.267906  | 1.919403  |
| 14.C | -3.427905 | 3.850266  | 2.279055  |
| 15.C | -3.215507 | 4.727069  | 3.472166  |
| 16.C | 4.620340  | 4.351411  | 0.373932  |
| 17.C | 5.046965  | 1.043253  | 2.278970  |
| 18.C | 4.551449  | 2.926340  | 0.816165  |
| 19.C | 5.172348  | 2.425058  | 1.919610  |
| 20.C | 1.619502  | 4.892990  | -2.279167 |
| 21.C | 5.699896  | 0.420626  | 3.472040  |

|      |           |           |           |
|------|-----------|-----------|-----------|
| 22.C | 4.810546  | -2.479460 | -0.815986 |
| 23.C | -0.258912 | 5.405699  | -0.816284 |
| 24.C | 0.485567  | 5.692562  | -1.919846 |
| 25.C | -1.458661 | 6.177904  | -0.374190 |
| 26.C | 2.484973  | 5.146802  | -3.472459 |
| 27.C | 6.079018  | -1.826486 | -0.373538 |
| 28.C | 4.687171  | -3.267906 | -1.919403 |
| 29.C | 3.427905  | -3.850266 | -2.279055 |
| 30.C | 3.215507  | -4.727069 | -3.472166 |
| 31.H | -6.294042 | -1.159325 | -4.021524 |
| 32.H | -6.347859 | 0.412736  | -3.163346 |
| 33.H | -4.942185 | 0.010151  | -4.142466 |
| 34.H | -2.142234 | -6.030565 | 4.022108  |
| 35.H | -2.479027 | -4.275045 | 4.142660  |
| 36.H | -3.530726 | -5.291323 | 3.163996  |
| 37.H | -4.152475 | 4.872291  | 4.021360  |
| 38.H | -2.463805 | 4.286274  | 4.142842  |
| 39.H | -2.817669 | 5.704890  | 3.163568  |
| 40.H | -5.783813 | -3.072660 | -2.552307 |
| 41.H | -0.230354 | -6.545735 | 2.552735  |
| 42.H | -5.553900 | 3.473636  | 2.551890  |
| 43.H | 6.294042  | 1.159325  | 4.021524  |
| 44.H | 6.347859  | -0.412736 | 3.163346  |
| 45.H | 4.942185  | -0.010151 | 4.142466  |
| 46.H | 2.142234  | 6.030565  | -4.022108 |
| 47.H | 2.479027  | 4.275045  | -4.142660 |
| 48.H | 3.530726  | 5.291323  | -3.163996 |
| 49.H | 4.152475  | -4.872291 | -4.021360 |
| 50.H | 2.463805  | -4.286274 | -4.142842 |
| 51.H | 2.817669  | -5.704890 | -3.163568 |
| 52.H | 5.783813  | 3.072660  | 2.552307  |
| 53.H | 0.230354  | 6.545735  | -2.552735 |
| 54.H | 5.553900  | -3.473636 | -2.551890 |
| 55.H | 3.639254  | 4.842849  | 0.457615  |
| 56.H | 5.336114  | 4.902821  | 0.999778  |
| 57.H | 4.925507  | 4.435497  | -0.677377 |
| 58.H | -4.925507 | -4.435497 | 0.677377  |
| 59.H | -5.336114 | -4.902821 | -0.999778 |
| 60.H | -3.639254 | -4.842849 | -0.457615 |
| 61.H | 6.304209  | -2.048625 | 0.677839  |
| 62.H | 6.914588  | -2.170678 | -0.999179 |
| 63.H | 6.014038  | -0.731132 | -0.457335 |
| 64.H | -6.014038 | 0.731132  | 0.457335  |
| 65.H | -6.914588 | 2.170678  | 0.999179  |
| 66.H | -6.304209 | 2.048625  | -0.677839 |
| 67.H | -1.378876 | 6.484498  | 0.677040  |
| 68.H | -1.578406 | 7.073323  | -1.000255 |
| 69.H | -2.374756 | 5.573884  | -0.457687 |

|       |           |           |           |
|-------|-----------|-----------|-----------|
| 70.H  | 2.374756  | -5.573884 | 0.457687  |
| 71.H  | 1.578406  | -7.073323 | 1.000255  |
| 72.H  | 1.378876  | -6.484498 | -0.677040 |
| 73.N  | -4.299169 | -0.317963 | -1.473067 |
| 74.N  | -1.873819 | -3.882919 | 1.473066  |
| 75.N  | -2.425706 | 3.565292  | 1.473377  |
| 76.N  | 4.299169  | 0.317963  | 1.473067  |
| 77.N  | 1.873819  | 3.882919  | -1.473066 |
| 78.N  | 2.425706  | -3.565292 | -1.473377 |
| 79.O  | -4.134826 | 0.986538  | -1.754800 |
| 80.O  | -2.921227 | -3.088172 | 1.754834  |
| 81.O  | -1.213866 | 4.075317  | 1.755148  |
| 82.O  | 4.134826  | -0.986538 | 1.754800  |
| 83.O  | 2.921227  | 3.088172  | -1.754834 |
| 84.O  | 1.213866  | -4.075317 | -1.755148 |
| 85.Te | -3.439865 | -1.484229 | 0.245558  |
| 86.Te | -0.434374 | -3.722263 | -0.245776 |
| 87.Te | -3.005594 | 2.237859  | -0.245308 |
| 88.Te | 3.439865  | 1.484229  | -0.245558 |
| 89.Te | 0.434374  | 3.722263  | 0.245776  |
| 90.Te | 3.005594  | -2.237859 | 0.245308  |

**Supplementary Table 8.** Optimized Cartesian coordinates of  $1c_{\infty}$  (1-D Lattice vector = 8.750435 Å).

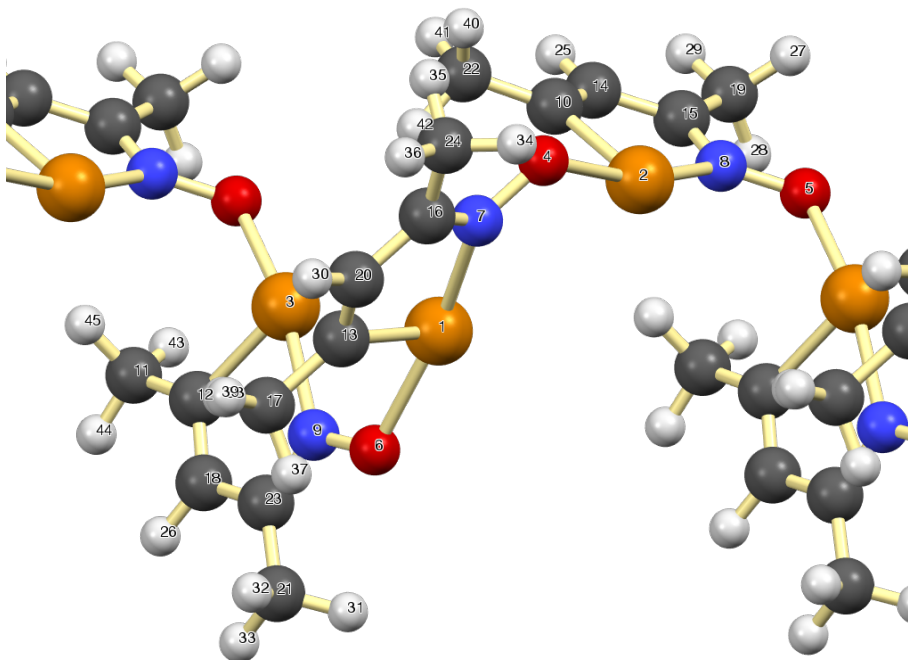

| Atom | X         | Y         | Z         |
|------|-----------|-----------|-----------|
| 1.Te | 3.821168  | -0.752590 | 1.231537  |
| 2.Te | 6.706353  | 1.347361  | -0.032977 |
| 3.Te | 0.913106  | -0.609182 | -1.210060 |
| 4.O  | 5.678606  | 1.853573  | 1.855642  |
| 5.O  | 8.638518  | 0.842652  | -2.587565 |
| 6.O  | 2.647904  | -2.583629 | 0.696520  |
| 7.N  | 4.730133  | 1.010169  | 2.293727  |
| 8.N  | 7.462529  | 1.316621  | -2.147316 |
| 9.N  | 1.541631  | -2.422246 | -0.048867 |
| 10.C | 5.184014  | 2.354405  | -1.122515 |
| 11.C | -1.775475 | -1.750563 | -2.525897 |
| 12.C | -0.604357 | -2.030701 | -1.643058 |
| 13.C | 2.757000  | -0.655770 | 3.068294  |
| 14.C | 5.465967  | 2.447345  | -2.448872 |
| 15.C | 6.687035  | 1.948565  | -2.998245 |
| 16.C | 4.247814  | 1.219399  | 3.498575  |
| 17.C | 1.655419  | -1.599963 | 3.428949  |
| 18.C | -0.405385 | -3.222401 | -1.020746 |
| 19.C | 7.104057  | 2.153102  | -4.413545 |
| 20.C | 3.206987  | 0.322843  | 3.900749  |
| 21.C | 1.014192  | -4.742554 | 0.502951  |
| 22.C | 3.930976  | 2.922246  | -0.534000 |
| 23.C | 0.735339  | -3.451498 | -0.189705 |
| 24.C | 4.759714  | 2.359865  | 4.314073  |
| 25.H | 4.751760  | 2.917008  | -3.125489 |

|      |           |           |           |
|------|-----------|-----------|-----------|
| 26.H | -1.129942 | -4.030020 | -1.135341 |
| 27.H | 8.049681  | 2.712963  | -4.438935 |
| 28.H | 7.284713  | 1.187637  | -4.906431 |
| 29.H | 6.326587  | 2.713908  | -4.940118 |
| 30.H | 2.776350  | 0.444653  | 4.897642  |
| 31.H | 2.053705  | -5.052097 | 0.332225  |
| 32.H | 0.888443  | -4.607660 | 1.587337  |
| 33.H | 0.322642  | -5.509657 | 0.141601  |
| 34.H | 5.858265  | 2.360518  | 4.310888  |
| 35.H | 4.447101  | 3.308116  | 3.850190  |
| 36.H | 4.375049  | 2.300017  | 5.336682  |
| 37.H | 1.995286  | -2.643260 | 3.428296  |
| 38.H | 1.272559  | -1.363136 | 4.432887  |
| 39.H | 0.814667  | -1.537792 | 2.725007  |
| 40.H | 4.143486  | 3.685734  | 0.225538  |
| 41.H | 3.338042  | 3.395432  | -1.331612 |
| 42.H | 3.298569  | 2.159220  | -0.059966 |
| 43.H | -1.457660 | -1.444543 | -3.531164 |
| 44.H | -2.406307 | -2.646688 | -2.615874 |
| 45.H | -2.401965 | -0.942979 | -2.125655 |

## Supplementary Methods

**DFT Calculations.** All DFT calculations were performed using the ADF/BAND DFT package (version 2013).<sup>2</sup> Models for  $\mathbf{1c}_n$  ( $n = 1, 2, 4, 6$ ) were built from idealized internal coordinates and fully optimized using the exchange-correlation functional of Perdew, Burke, and Ernzerhof<sup>3</sup> and corrected for dispersion<sup>4</sup> with a triple- $\zeta$  all-electron basis set with two polarization functions each and applying the Zeroth Order Regular Approximation (ZORA)<sup>5-8</sup> formalism with specially adapted basis sets. Analytical vibrational frequencies<sup>9-11</sup> were calculated in order to demonstrate that each structure converged to an actual minimum in the potential energy surface and to derive the corresponding thermodynamic parameters.<sup>12,13</sup> Periodic calculations employed Becke's version of the fuzzy cells integration scheme.<sup>14,15</sup>



**Crystallographic Solution and Refinement.** Preliminary unit cell parameters were determined using a minimum of 50 frames from three different orientations, and final cell refinement after integration in SAINT.<sup>16</sup> Data were then corrected for absorption in SADABS.<sup>17</sup> The structures were solved by direct methods and refined by the full-matrix least-squares techniques on  $F^2$  using SHELXL.<sup>18</sup> Anisotropic thermal parameters were assigned to all non-hydrogen atoms. Hydrogen atoms were placed in idealized positions using appropriate riding models. Specific details of each refinement are compiled in Supplementary Table 1.

## Supplementary References

1. Kübel, J., Elder, P. J. W., Jenkins, H. A. & Vargas-Baca, I. Structure and formation of the first (–O–Te–N–)4 ring. *Dalton Trans* **39**, 11126–11128 (2010).
2. Guerra, C. F., Snijders, J. G., Velde, te, G. & Baerends, E. J. Towards an order-N DFT method. *Theor. Chem. Acc.* **99**, 391–403 (1998).
3. Perdew, J. P., Burke, K. & Ernzerhof, M. Generalized gradient approximation made simple. *Phys. Rev. Lett.* **77**, 3865–3868 (1996).
4. Grimme, S. Semiempirical GGA-type density functional constructed with a long-range dispersion correction. *J. Comp. Chem.* **27**, 1787–1799 (2006).
5. van Lenthe, E., Ehlers, A. & Baerends, E.-J. Geometry optimizations in the zero order regular approximation for relativistic effects. *J. Chem. Phys.* **110**, 8943–8953 (1999).
6. Van Lenthe, E., Baerends, E. J. & Snijders, J. G. Relativistic regular two-component Hamiltonians. *J. Chem. Phys.* **99**, 4597–4610 (1993).
7. Van Lenthe, E., Baerends, E. J. & Snijders, J. G. Relativistic total energy using regular approximations. *J. Chem. Phys.* **101**, 9783–9792 (1994).
8. Van Lenthe, E., Snijders, J. G. & Baerends, E. J. The zero-order regular approximation for relativistic effects: The effect of spin–orbit coupling in closed shell molecules. *J. Chem. Phys.* **105**, 6505–6516 (1996).
9. Bérces, A. *et al.* An implementation of the coupled perturbed Kohn-Sham equations: perturbation due to nuclear displacements. *Comp. Phys. Commun.* **100**, 247–262 (1997).
10. Jacobsen, H., Bérces, A., Swerhone, D. P. & Ziegler, T. Analytic second derivatives of molecular energies: a density functional implementation. *Comp. Phys. Commun.* **100**, 263–276 (1997).
11. Wolff, S. K. Analytical second derivatives in the Amsterdam density functional package. *Int. J. Quantum Chem.* **104**, 645–659 (2005).
12. and, M. S. & Bickelhaupt, F. M. Proton Affinities of Anionic Bases: Trends Across the Periodic Table, Structural Effects, and DFT Validation. *J. Chem. Theory Comput.* **2**, 281–287 (2005).
13. Swart, M., Rösler, E. & Bickelhaupt, F. M. Proton affinities of maingroup-element hydrides and noble gases: Trends across the periodic table, structural effects, and DFT validation. *J. Comp. Chem.* **27**, 1486–1493 (2006).
14. Becke, A. D. A multicenter numerical integration scheme for polyatomic molecules. *J. Chem. Phys.* **88**, 2547–2553 (1988).
15. Franchini, M., Philipsen, P. H. T. & Visscher, L. The Becke Fuzzy Cells Integration Scheme in the Amsterdam Density Functional Program Suite. *J. Comp. Chem.* **34**, 1819–1827 (2013).
16. Bruker (2012). *SAINTE*. Bruker AXS Inc., Madison, Wisconsin, USA.
17. Bruker (2001). *SADABS*. Bruker AXS Inc., Madison, Wisconsin, USA.
18. Sheldrick, G. M. Crystal structure refinement with SHELXL. *Acta Cryst.* **C71**, 3–8 (2015).
